# Supplementary material for: Climatic Zone and Soil Properties Determine the Biodiversity of the Soil Bacterial Communities Associated to Native Plants from Desert Areas of North-Central Algeria
Source: MDPI journal article supplement (doi:10.3390/microorganisms9071359), 2021-06-23
Supplement: s1 [file s1]

**Climatic zone and soil properties determine the biodiversity of the soil microbial communities associated to native plants from desert areas of North-Central Algeria**

Bona E.<sup>1</sup>, Massa N.<sup>2\*</sup>, Toumatia O.<sup>3,4</sup>, Novello G.<sup>2</sup>, Cesaro P.<sup>2</sup>, Todeschini V.<sup>1</sup>, Boatti L.<sup>2,5</sup>, Mignone F.<sup>2,5</sup>, Titouah H.<sup>4</sup>, Zitouni A.<sup>4</sup>, Lingua G.<sup>2</sup>, Vuolo F.<sup>6</sup>, Gamalero E.<sup>2</sup>

<sup>1</sup> Università del Piemonte Orientale, Dipartimento di Scienze e Innovazione Tecnologica, Piazza San Eusebio 5, 13100 Vercelli, Italy

<sup>2</sup> Università del Piemonte Orientale, Dipartimento di Scienze e Innovazione Tecnologica, Viale T. Michel 11, Alessandria 15121, Italy

<sup>3</sup> Agro-Pastoralism Research Center (APRC) Djelfa, Algeria.

<sup>4</sup> Laboratoire de Biologie des Systèmes Microbiens (LBSM), Ecole Normale Supérieure (ENS) de Kouba, Algiers, Algeria.

<sup>5</sup> SmartSeq s.r.l., spin-off of the Università del Piemonte Orientale, Viale T. Michel 11, Alessandria 15121, Italy

<sup>6</sup> Sacco s.r.l., Via Alessandro Manzoni 29/A, 22071, Cadorago (CO) Italy

**\*Corresponding author:**

Nadia Massa Ph.D.

Dipartimento di Scienze e Innovazione Tecnologica, Università del Piemonte Orientale,  
Viale T. Michel 11, Alessandria 15121, Italy

Tel: +39 0131 360 231

Fax: +39 0131 360 243

E-mail: [nadia.massa@uniupo.it](mailto:nadia.massa@uniupo.it)

**Table S1.** Information regarding the 14 Algerian autochthonous plant species.

**Table S2.** Physical-chemical properties of the soils sampled from the rhizosphere of 14 different plant species in North-Central Algeria.

**Table S3.** Linear discriminant analysis Effect Size (LEfSe) at species level according to sampling site. All the possible comparisons are reported in the table. Light gray indicates species less present in the first sampling site than in the second one and red indicates a presence less than 50%. Dark gray indicates species more present in the first sampling site than in the second one and green indicates a presence more than 200%.

**Figure S1.** A) Precipitation (mm), B) Wind speed ( $\text{ms}^{-1}$ ), C) Average T ( $^{\circ}\text{C}$ ) in the year 2018 in the six Algerian sampling sites and Alessandria town in Italy as reference.

**Figure S2.** A) Minimum temperature ( $^{\circ}\text{C}$ ), B) Maximum temperature ( $^{\circ}\text{C}$ ) Temperature difference ( $^{\circ}\text{C}$ ) in the year 2018 in the six Algerian sampling sites and Alessandria town in Italy as reference.

**Figure S3.** Phylum abundance (%) in A) plants, B) sampling sites and C) climatic zone.

**Figure S4.** CORE analysis at phylum level according to sampling site (climatic zone). The Microbiome CORE analysis identifies core taxa that remain unchanged in their composition across the whole microbial community. Two parameters are considered: sample prevalence and relative abundance (%) of a taxa. Core microbiome analysis is adopted from the core function in R package microbiome. The result of this analysis is represented in the form of heatmap of core taxa where Y-axis represent the prevalence level of core features across the detection threshold (Relative abundance) range on X-axis. Two soil sampling sites in the arid region of Ghardaïa (Algeria): Metlili and Beni Isguen. Four soil sampling sites in the semi-arid region of Djelfa (Algeria): Messaad, Ain Naga, Moudjbara and Zaafrane.

**Figure S5.** CORE analysis at species level according to sampling site.

**Figure S6.** CORE analysis at phylum level according to climatic zone.

**Figure S7.** CORE analysis at species level according to climatic zone.

**Figure S8.** Heat trees at phylum level. Heat trees report the effect of the sampling site on hierarchical structure of taxonomic classifications (median abundance, non-parameter Wilcoxon Rank Sum test). The reported comparisons are **Metlili** vs A) Ain Naga, B) Beni Isguen, C) Messaad, D) Moudjbara, E) Zaafrane; **Beni Isguen** vs F) Ain Naga, G) Messaad, H) Moudjbara, I) Zaafrane; **Messaad** vs J) Ain Naga, K) Moudjbara, L) Zaafrane; **Ain Naga** vs M) Moudjbara, N) Zaafrane and finally **Moudjbara** vs O) Zaafrane. Comparing Sample 1 vs Sample 2, a blue line indicates that one phylum in sample 2 is more abundant than in sample 1, while a red line indicates that one phylum in sample 2 is less abundant than in sample 1. Heat tree analysis was performed using R metacoder package of MicrobiomeAnalyst, a free available on-line software (<https://www.microbiomeanalyst.ca>).



|    |                   |                             |                             |                            |                |                                                                                                                                                                                                                                                                                                                                                                                                                                                                                   |
|----|-------------------|-----------------------------|-----------------------------|----------------------------|----------------|-----------------------------------------------------------------------------------------------------------------------------------------------------------------------------------------------------------------------------------------------------------------------------------------------------------------------------------------------------------------------------------------------------------------------------------------------------------------------------------|
|    | Messaad, Djelfa   | 34°06'12.6"N<br>3°33'49.8"E | <i>Retama raetam</i>        | R'tem (رتّم)               | Fabaceae       | Retama species contain alkaloids, flavonoids with antibacterial, antifungal and cytotoxic activities [33]. <i>Retama raetam</i> is widely used in dune stabilization and soil fixation. Furthermore, it is capable of producing significant quantities of biomass which are exploited as fodder, an important raw material resource for microfibers production and for the treatment of various human and animal diseases as intestinal worms, scabies, Fever, abortion [22, 34]. |
| 8  | Ain Naga, Djelfa  | 34°24'18.1"N<br>3°28'38.2"E | <i>Stipa tenacissima</i>    | Halfa (حلفاء)              | Poaceae        | It is also named Esparto grass and in Algeria it is used as a main source of fiber for paper production [35]. It is used to modulate melancholy, neuralgia and hypercholesterolemia [22].                                                                                                                                                                                                                                                                                         |
| 9  | Moudjbara, Djelfa | 34°34'19.3"N<br>3°25'28.2"E | <i>Artemisia herba-alba</i> | Shih (شيب)                 | Asteraceae     | It is used in the traditional medicine of the Northern Badia region of Jordan, in the form of a decoction, against fever and menstrual and nervous problems. It is also known as desert wormwood and it has been used in folk medicine by many cultures since ancient times and in Moroccan folk medicine to treat arterial hypertension and/or diabetes [36]. In Algeria, it is used to treat stomach pain and some genital infections [22].                                     |
| 10 | Zaafrane, Djelfa  | 34°52'04.6"N<br>2°50'56.5"E | <i>Salsola tetragona</i>    | Djel, Belbel (جل)          | Chenopodiaceae | The leaves and sprouts of many <i>Salsola</i> species are edible, and sometimes the plants are specially grown and used for salads or to flavor sushi. It is used also as camel forage [37]. Furthermore, it is used for the treatment of indigestion, constipation, belly and stomach pain [38].                                                                                                                                                                                 |
| 11 | Zaafrane, Djelfa  | 34°52'09.7"N<br>2°50'56.7"E | <i>Atriplex halimus</i>     | G'taf (قطف)                | Chenopodiaceae | It has a high agricultural value: the leaves, available all year round, have an excellent salty taste and can be added to salads or cooked like spinach, while the seeds are used to thicken soups or are mixed with cereals to make bread. It is the common fodder shrub that are used for revegetation of rangelands and to generate plant cover in contaminated soils [39]. The main curative aspect is the treatment of cysts [40].                                           |
| 12 | Zaafrane, Djelfa  | 34°52'19.3"N<br>2°50'58.3"E | <i>Pegannum harmala</i>     | Harmal, Syrian Rue (حرميل) | Nitrariaceae   | It is used for medicinal and psychoactive purposes since ancient times. Its seeds are known to possess hypothermic and hallucinogenic properties, and are used as spices or condiments. Due to its abortive,                                                                                                                                                                                                                                                                      |

|    |                  |                             |                              |                 |               |                                                                                                                                                                                                                                                                                                                            |
|----|------------------|-----------------------------|------------------------------|-----------------|---------------|----------------------------------------------------------------------------------------------------------------------------------------------------------------------------------------------------------------------------------------------------------------------------------------------------------------------------|
|    |                  |                             |                              |                 |               | <p>narcotic, aphrodisiac, stimulant, sedative, and emetic properties it is used for the treatment of syphilis, fever, hysteria, malaria, neuralgia, parkinsonism, rheumatism, colic, asthma and ocular disorders [41]. It is used also to alleviate leishmaniasis, rheumatoid arthritis, seizures and depression [22].</p> |
| 13 | Zaafrane, Djelfa | 34°52'26.9"N<br>2°50'53.4"E | <i>Suaeda fruticosa</i>      | Suaeda (سويذا)  | Amaranthaceae | <p>It is a source of cardiotonic and anti-infective agents. It could be a valuable source of phenolic and flavonoid compounds with antioxidant, anti-inflammatory and anticancer properties [42].</p>                                                                                                                      |
| 14 | Zaafrane, Djelfa | 34°52'01.1"N<br>2°50'56.6"E | <i>Thymelaea microphylla</i> | Methnan (مثنان) | Thymelaaceae  | <p>It shows biological activities thanks to the richness of bioactive secondary metabolites such as flavonoids, sterols, terpenes and coumarins [43]. It is used for hair care and the alleviation of hair loss, helminthiasis and depression [22].</p>                                                                    |

**Table S2.** Physical-chemical properties of the soils sampled from the rhizosphere of 14 different plant species in North-Central Algeria.

| Area                   | Texture                  | pH                       | Organic matter (%)      | Total CaCO <sub>3</sub> (%) | Active CaCO <sub>3</sub> (%) | Total Phosphorus (ppm)      | Olsen Phosphorus (ppm)  | Electrical conductivity (Ms/cm) at 25°C | Total Nitrogen (%)           | Plant species                                                                                                                            |
|------------------------|--------------------------|--------------------------|-------------------------|-----------------------------|------------------------------|-----------------------------|-------------------------|-----------------------------------------|------------------------------|------------------------------------------------------------------------------------------------------------------------------------------|
|                        |                          |                          |                         |                             |                              |                             |                         |                                         |                              |                                                                                                                                          |
| Mettli, Chardaiïa      | Sandy-silty              | 7.2±0.06                 | 0.33±0.01               | 8.87±0.18                   | 3.31±0.13                    | 102.54±2.88                 | 8.13±0.20               | 0.525±0.02                              | 0.13±0.01                    | <i>Cleome arabica</i><br><i>Reseda villosa</i>                                                                                           |
| Beni Isguen, Chardaiïa | Sandy-silty              | 8.31±0.10                | 0.89±0.03               | 7.26±0.20                   | 5.23±0.11                    | 112.39±4.80                 | 19.88±0.26              | 0.612±0.03                              | 0.15±0.02                    | <i>Zilla spinosa</i><br><i>Pulicaria undulata</i>                                                                                        |
| Messaad, Djelfa        | Silty-sandy              | 8.23±0.07                | 0.36±0.01               | 10.89±0.09                  | 4.53±0.09                    | 138.07±3.20                 | 12.27±0.16              | 0.416±0.01                              | 0.07±0.01                    | <i>Arthrophytum scoparium</i><br><i>Astragalus armatus</i><br><i>Retama raeltam</i>                                                      |
| Ain Naga, Djelfa       | Silty-sandy              | 7.83±0.05                | 0.41±0.02               | 12.19±0.19                  | 6.11±0.05                    | 148.78±3.50                 | 33.22±0.20              | 0.211±0.01                              | 0.08±0.01                    | <i>Stipa tenacissima</i>                                                                                                                 |
| Moudjbara, Djelfa      | Silty-sandy              | 7.23±0.05                | 0.45±0.04               | 11.5±0.07                   | 5.65±0.04                    | 168.02±4.11                 | 24.56±0.30              | 0.287±0.02                              | 0.12±0.02                    | <i>Artemisia herba-alba</i>                                                                                                              |
| Zafrane, Djelfa        | Sandy-silty              | 7.9±0.07                 | 0.51±0.03               | 9.56±0.13                   | 4.12±0.05                    | 152.31±3.89                 | 3.54±0.05               | 0.823±0.02                              | 0.11±0.01                    | <i>Salsola tetragona</i><br><i>Atriplex halimus</i><br><i>Peganum harmala</i><br><i>Suaeda fruticosa</i><br><i>Thymelaea microphylla</i> |
| Method*                | Soil Survey Staff (1999) | Al-Busaidi et al. (2005) | Baize and Jabiol (2011) | Baize and Jabiol (2011)     | Baize and Jabiol (2011)      | Rowland and Haygarth (1997) | Maghsoodi et al. (2015) | Thomas (1982)                           | Bremner and Tabatabai (1972) |                                                                                                                                          |

- Maghsoodi, M., Reyhanitabar, A. and Najafi, N. (2015). Development of an alternative to the Olsen test for determining corn plant-available phosphorus in calcareous soils. *Iran Agricultural Research*, 34(1), 92-104. doi: 10.22099/iar.2015.3096
- Rowland, A.P. and Haygarth, P.M. (1997). Determination of total dissolved phosphorus in soil solutions. *Journal of Environmental Quality*, 26: 410–415. doi: 10.2134/jeq1997.00472425002600020011x
- Soil Survey Staff (1999). *Soil Taxonomy: A Basic System of Soil Classification for Making and Interpreting Soil Surveys*, second ed. Natural Resources Conservation Service, U.S. Department of Agriculture, Washington, DC. Agriculture Handbook 436.
- Thomas, G.W. (1982). Exchangeable cations. In: A.L. Page, R.H. Muler, and D.R. Keeney, editors. *Methods of soil analysis*. Part 2. Agron. Monogr. 9, 2nd ed. ASA and SSSA, Madison, WI. p. 159-164.



Table S3. Linear discriminant analysis Effect Size (LHSE) at species level according to sampling site. All the possible comparisons are reported in the table. Light gray indicates species less present in the first sampling site than in the second one and red indicates a presence less than 50%. Dark gray indicates species more present in the first sampling site than in the second one and green indicates a presence more than 200%.

| Species                         | Phylum        | P-values (LD) | score | Bent/ leguen/ Methyl % | Bent leguen/ Ain Naga % | Bent leguen/ Messand % | Bent leguen/ Moudjbara % | Bent leguen/ Zaïtrafrane % | Methyl/ Ain Naga % | Methyl/ Messand % | Methyl/ Moudjbara % | Methyl/ Zaïtrafrane % | Ain Naga/ Moudjbara % | Ain Naga/ Zaïtrafrane % | Messand/ Moudjbara % | Messand/ Zaïtrafrane % |
|---------------------------------|---------------|---------------|-------|------------------------|-------------------------|------------------------|--------------------------|----------------------------|--------------------|-------------------|---------------------|-----------------------|-----------------------|-------------------------|----------------------|------------------------|
| unclassified Acidobacteria      | Acidobacteria | 0.0002639     | 4.25  | 98%                    | 117%                    | 153%                   | 71%                      | 150%                       | 119%               | 157%              | 72%                 | 153%                  | 131%                  | 61%                     | 128%                 | 46%                    |
| unclassified Acidobacteria Gp3  | Acidobacteria | 0.0000008     | 4.27  | 169%                   | 153%                    | 179%                   | 106%                     | 181%                       | 91%                | 279%              | 116%                | 285%                  | 308%                  | 128%                    | 102%                 | 102%                   |
| unclassified Acidobacteria Gp4  | Acidobacteria | 0.0000001     | 4.70  | 23%                    | 71%                     | 21%                    | 10%                      | 29%                        | 316%               | 92%               | 46%                 | 127%                  | 29%                   | 15%                     | 40%                  | 276%                   |
| unclassified Acidobacteria Gp11 | Acidobacteria | 0.0003542     | 4.11  | 17%                    | 39%                     | 28%                    | 9%                       | 27%                        | 227%               | 159%              | 54%                 | 156%                  | 70%                   | 24%                     | 50%                  | 138%                   |
| unclassified Acidobacteria Gp12 | Acidobacteria | 0.0000006     | 3.96  | 11%                    | 44%                     | 21%                    | 14%                      | 26%                        | 403%               | 188%              | 124%                | 239%                  | 47%                   | 31%                     | 59%                  | 288%                   |
| unclassified Acidobacteria Gp13 | Acidobacteria | 0.00022525    | 4.51  | 177%                   | 157%                    | 160%                   | 211%                     | 157%                       | 89%                | 90%               | 119%                | 89%                   | 102%                  | 134%                    | 100%                 | 192%                   |
| unclassified Acidobacteria Gp14 | Acidobacteria | 0.0000152     | 4.57  | 336%                   | 569%                    | 434%                   | 645%                     | 675%                       | 169%               | 129%              | 192%                | 201%                  | 76%                   | 113%                    | 119%                 | 74%                    |
| unclassified Acidobacteria Gp15 | Acidobacteria | 0.0000002     | 5.74  | 194%                   | 491%                    | 160%                   | 304%                     | 358%                       | 253%               | 82%               | 157%                | 185%                  | 33%                   | 62%                     | 73%                  | 105%                   |
| unclassified Acidobacteria Gp16 | Acidobacteria | 0.0000742     | 5.08  | 154%                   | 116%                    | 153%                   | 219%                     | 166%                       | 75%                | 99%               | 142%                | 108%                  | 132%                  | 189%                    | 143%                 | 118%                   |
| unclassified Acidobacteria Gp17 | Acidobacteria | 0.0000242     | 4.08  | 77%                    | 25%                     | 206%                   | 39%                      | 112%                       | 33%                | 267%              | 51%                 | 144%                  | 820%                  | 156%                    | 19%                  | 284%                   |
| unclassified Acidobacteria Gp18 | Acidobacteria | 0.0000029     | 4.06  | 694%                   | 746%                    | 1657%                  | 1435%                    | 182%                       | 107%               | 259%              | 207%                | 26%                   | 222%                  | 192%                    | 87%                  | 13%                    |
| unclassified Acidobacteria Gp19 | Acidobacteria | 0.0000029     | 5.31  | 484%                   | 2824%                   | 346%                   | 81%                      | 43%                        | 583%               | 71%               | 87%                 | 452%                  | 12%                   | 15%                     | 121%                 | 521%                   |
| unclassified Acidobacteria Gp20 | Acidobacteria | 0.0000082     | 3.84  | 67%                    | 51%                     | 94%                    | 8%                       | 47%                        | 77%                | 142%              | 12%                 | 65%                   | 185%                  | 158%                    | 86%                  | 46%                    |
| unclassified Acidobacteria Gp21 | Acidobacteria | 0.0000408     | 4.19  | 31%                    | 23%                     | 128%                   | 49%                      | 47%                        | 75%                | 41%               | 23%                 | 55%                   | 196%                  | 211%                    | 203%                 | 37%                    |
| unclassified Acidobacteria Gp22 | Acidobacteria | 0.0000283     | 4.20  | 65%                    | 27%                     | 53%                    | 15%                      | 36%                        | 41%                | 80%               | 96%                 | 55%                   | 196%                  | 55%                     | 28%                  | 68%                    |
| unclassified Acidobacteria Gp23 | Acidobacteria | 0.0000042     | 4.43  | 172%                   | 312%                    | 100%                   | 147%                     | 48%                        | 181%               | 69%               | 85%                 | 33%                   | 440%                  | 615%                    | 140%                 | 243%                   |
| unclassified Acidobacteria Gp24 | Acidobacteria | 0.0000011     | 4.64  | 56%                    | 38%                     | 107%                   | 86%                      | 121%                       | 67%                | 178%              | 152%                | 54%                   | 99%                   | 47%                     | 48%                  | 30%                    |
| unclassified Acidobacteria Gp25 | Acidobacteria | 0.0000740     | 4.49  | 365%                   | 129%                    | 237%                   | 354%                     | 158%                       | 35%                | 65%               | 97%                 | 43%                   | 281%                  | 226%                    | 317%                 | 63%                    |
| unclassified Acidobacteria Gp26 | Acidobacteria | 0.0002040     | 4.12  | 250%                   | 85%                     | 247%                   | 266%                     | 109%                       | 34%                | 90%               | 166%                | 78%                   | 290%                  | 312%                    | 123%                 | 140%                   |
| unclassified Acidobacteria Gp27 | Acidobacteria | 0.0000931     | 4.20  | 9%                     | 37%                     | 25%                    | 22%                      | 81%                        | 420%               | 282%              | 254%                | 933%                  | 67%                   | 60%                     | 108%                 | 73%                    |
| unclassified Acidobacteria Gp28 | Acidobacteria | 0.00024329    | 4.08  | 125%                   | 138%                    | 108%                   | 378%                     | 191%                       | 111%               | 87%               | 304%                | 153%                  | 290%                  | 274%                    | 90%                  | 368%                   |
| unclassified Acidobacteria Gp29 | Acidobacteria | 0.0000019     | 5.25  | 17%                    | 22%                     | 16%                    | 9%                       | 19%                        | 127%               | 87%               | 50%                 | 122%                  | 78%                   | 39%                     | 89%                  | 51%                    |
| unclassified Acidobacteria Gp30 | Acidobacteria | 0.0000282     | 4.10  | 182%                   | 215%                    | 312%                   | 281%                     | 518%                       | 118%               | 172%              | 155%                | 286%                  | 146%                  | 131%                    | 242%                 | 224%                   |
| unclassified Acidobacteria Gp31 | Acidobacteria | 0.0000732     | 4.61  | 171%                   | 219%                    | 154%                   | 183%                     | 244%                       | 91%                | 91%               | 103%                | 103%                  | 83%                   | 112%                    | 90%                  | 184%                   |
| unclassified Acidobacteria Gp32 | Acidobacteria | 0.0054961     | 3.97  | 191%                   | 184%                    | 65%                    | 293%                     | 200%                       | 96%                | 23%               | 153%                | 105%                  | 36%                   | 160%                    | 448%                 | 305%                   |
| unclassified Acidobacteria Gp33 | Acidobacteria | 0.0000001     | 4.01  | 279%                   | 69%                     | 187%                   | 456%                     | 991%                       | 251%               | 67%               | 164%                | 356%                  | 27%                   | 65%                     | 142%                 | 68%                    |
| unclassified Acidobacteria Gp34 | Acidobacteria | 0.0000193     | 3.77  | 105%                   | 115%                    | 168%                   | 9%                       | 301%                       | 109%               | 160%              | 92%                 | 286%                  | 147%                  | 85%                     | 58%                  | 179%                   |
| unclassified Acidobacteria Gp35 | Acidobacteria | 0.0000000     | 3.97  | 131%                   | 428%                    | 25%                    | 284%                     | 480%                       | 328%               | 192%              | 218%                | 367%                  | 59%                   | 66%                     | 113%                 | 169%                   |
| unclassified Acidobacteria Gp36 | Acidobacteria | 0.0000333     | 3.92  | 34%                    | 54%                     | 28%                    | 31%                      | 24%                        | 162%               | 84%               | 91%                 | 71%                   | 52%                   | 56%                     | 109%                 | 85%                    |
| unclassified Acidobacteria Gp37 | Acidobacteria | 0.0000136     | 3.95  | 704%                   | 162%                    | 1430%                  | 704%                     | 274%                       | 23%                | 203%              | 100%                | 39%                   | 884%                  | 436%                    | 40%                  | 39%                    |
| unclassified Acidobacteria Gp38 | Acidobacteria | 0.0000002     | 4.14  | 78%                    | 203%                    | 1593%                  | 592%                     | 341%                       | 26%                | 203%              | 75%                 | 43%                   | 783%                  | 291%                    | 37%                  | 58%                    |
| unclassified Acidobacteria Gp39 | Acidobacteria | 0.0000003     | 4.14  | 36%                    | 13%                     | 35%                    | 23%                      | 13%                        | 27%                | 62%               | 42%                 | 24%                   | 232%                  | 158%                    | 90%                  | 57%                    |
| unclassified Acidobacteria Gp40 | Acidobacteria | 0.0125190     | 3.02  | 141%                   | 86%                     | 123%                   | 66%                      | 97%                        | 61%                | 87%               | 49%                 | 69%                   | 143%                  | 80%                     | 63%                  | 79%                    |
| unclassified Acidobacteria Gp41 | Acidobacteria | 0.0000044     | 3.95  | 634%                   | 124%                    | 439%                   | 260%                     | 130%                       | 20%                | 69%               | 41%                 | 20%                   | 354%                  | 209%                    | 56%                  | 30%                    |
| unclassified Acidobacteria Gp42 | Acidobacteria | 0.0000005     | 3.87  | 120%                   | 28%                     | 273%                   | 68%                      | 30%                        | 24%                | 24%               | 57%                 | 25%                   | 958%                  | 240%                    | 105%                 | 50%                    |
| unclassified Acidobacteria Gp43 | Acidobacteria | 0.0000000     | 4.49  | 186%                   | 3%                      | 34%                    | 26%                      | 2%                         | 1%                 | 18%               | 14%                 | 1%                    | 1258%                 | 973%                    | 77%                  | 11%                    |
| unclassified Acidobacteria Gp44 | Acidobacteria | 0.0000037     | 5.34  | 95%                    | 11%                     | 71%                    | 40%                      | 31%                        | 23%                | 15%               | 85%                 | 65%                   | 655%                  | 370%                    | 62%                  | 6%                     |
| unclassified Acidobacteria Gp45 | Acidobacteria | 0.0000001     | 3.99  | 47%                    | 72%                     | 433%                   | 151%                     | 59%                        | 76%                | 456%              | 159%                | 62%                   | 599%                  | 209%                    | 82%                  | 39%                    |
| unclassified Acidobacteria Gp46 | Acidobacteria | 0.0000000     | 4.97  | 34%                    | 10%                     | 55%                    | 161%                     | 22%                        | 30%                | 161%              | 166%                | 64%                   | 546%                  | 564%                    | 215%                 | 38%                    |
| unclassified Acidobacteria Gp47 | Acidobacteria | 0.0000000     | 5.00  | 189%                   | 475%                    | 957%                   | 161%                     | 797%                       | 252%               | 507%              | 854%                | 423%                  | 202%                  | 339%                    | 168%                 | 50%                    |
| unclassified Acidobacteria Gp48 | Acidobacteria | 0.0000000     | 4.83  | 77%                    | 74%                     | 256%                   | 107%                     | 199%                       | 97%                | 334%              | 140%                | 260%                  | 345%                  | 145%                    | 266%                 | 83%                    |
| unclassified Acidobacteria Gp49 | Acidobacteria | 0.0000011     | 4.74  | 97%                    | 60%                     | 687%                   | 201%                     | 118%                       | 96%                | 706%              | 207%                | 121%                  | 1153%                 | 337%                    | 197%                 | 58%                    |
| unclassified Acidobacteria Gp50 | Acidobacteria | 0.006656      | 3.79  | 82%                    | 78%                     | 223%                   | 245%                     | 151%                       | 96%                | 273%              | 301%                | 185%                  | 286%                  | 315%                    | 194%                 | 62%                    |
| unclassified Acidobacteria Gp51 | Acidobacteria | 0.0062016     | 4.02  | 64%                    | 36%                     | 212%                   | 41%                      | 65%                        | 56%                | 350%              | 64%                 | 102%                  | 593%                  | 114%                    | 183%                 | 17%                    |
| unclassified Acidobacteria Gp52 | Acidobacteria | 0.0000011     | 4.21  | 178%                   | 243%                    | 572%                   | 353%                     | 209%                       | 137%               | 322%              | 200%                | 118%                  | 235%                  | 146%                    | 86%                  | 59%                    |
| unclassified Acidobacteria Gp53 | Acidobacteria | 0.0002522     | 5.13  | 59%                    | 51%                     | 71%                    | 24%                      | 39%                        | 87%                | 120%              | 42%                 | 67%                   | 159%                  | 48%                     | 35%                  | 37%                    |
| unclassified Acidobacteria Gp54 | Acidobacteria | 0.000037      | 3.83  | 65%                    | 118%                    | 136%                   | 45%                      | 208%                       | 181%               | 208%              | 70%                 | 319%                  | 115%                  | 38%                     | 77%                  | 160%                   |
| unclassified Acidobacteria Gp55 | Acidobacteria | 0.0000000     | 4.47  | 206%                   | 150%                    | 464%                   | 483%                     | 557%                       | 73%                | 225%              | 233%                | 270%                  | 309%                  | 343%                    | 33%                  | 153%                   |
| unclassified Acidobacteria Gp56 | Acidobacteria | 0.0000026     | 4.20  | 16%                    | 9%                      | 42%                    | 37%                      | 15%                        | 53%                | 261%              | 231%                | 95%                   | 492%                  | 424%                    | 104%                 | 120%                   |
| unclassified Acidobacteria Gp57 | Acidobacteria | 0.0000036     | 5.14  | 68%                    | 56%                     | 120%                   | 133%                     | 109%                       | 82%                | 177%              | 198%                | 136%                  | 215%                  | 179%                    | 88%                  | 41%                    |
| unclassified Acidobacteria Gp58 | Acidobacteria | 0.0000197     | 3.65  | 70%                    | 78%                     | 306%                   | 189%                     | 158%                       | 113%               | 440%              | 271%                | 126%                  | 391%                  | 231%                    | 62%                  | 84%                    |
| unclassified Acidobacteria Gp59 | Acidobacteria | 0.0000359     | 4.08  | 39%                    | 9%                      | 49%                    | 157%                     | 27%                        | 24%                | 104%              | 406%                | 68%                   | 429%                  | 1678%                   | 392%                 | 17%                    |
| unclassified Acidobacteria Gp60 | Acidobacteria | 0.0132480     | 3.79  | 28%                    | 138%                    | 198%                   | 187%                     | 225%                       | 48%                | 69%               | 65%                 | 79%                   | 143%                  | 135%                    | 163%                 | 120%                   |
| unclassified Acidobacteria Gp61 | Acidobacteria | 0.000104      | 4.84  | 48%                    | 37%                     | 46%                    | 75%                      | 38%                        | 76%                | 97%               | 157%                | 80%                   | 127%                  | 205%                    | 105%                 | 51%                    |
| unclassified Acidobacteria Gp62 | Acidobacteria | 0.0009143     | 4.66  | 121%                   | 109%                    | 162%                   | 83%                      | 149%                       | 97%                | 133%              | 69%                 | 80%                   | 148%                  | 76%                     | 162%                 | 92%                    |
| unclassified Acidobacteria Gp63 | Acidobacteria | 0.0000009     | 3.87  | 16%                    | 15%                     | 16%                    | 19%                      | 33%                        | 90%                | 100%              | 120%                | 123%                  | 103%                  | 123%                    | 52%                  | 173%                   |
| unclassified Acidobacteria Gp64 | Acidobacteria | 0.0000374     | 4.43  | 75%                    | 201%                    | 360%                   | 188%                     | 33%                        | 269%               | 107%              | 120%                | 206%                  | 148%                  | 94%                     | 105%                 | 110%                   |
| unclassified Acidobacteria Gp65 | Acidobacteria | 0.0000933     | 3.91  | 71%                    | 15%                     | 27%                    | 33%                      | 18%                        | 21%                | 48%               | 46%                 | 26%                   | 177%                  | 216%                    | 129%                 | 55%                    |
| unclassified Acidobacteria Gp66 | Acidobacteria | 0.0000074     | 4.22  | 430%                   | 221%                    | 406%                   | 132%                     | 143%                       | 51%                | 94%               | 31%                 | 31%                   | 184%                  | 60%                     | 33%                  | 101%                   |
| unclassified Acidobacteria Gp67 | Acidobacteria | 0.0000874     | 4.11  | 32%                    | 92%                     | 124%                   | 85%                      | 133%                       | 28%                | 388%              | 265%                | 446%                  | 133%                  | 93%                     | 156%                 | 168%                   |
| unclassified Acidobacteria Gp68 | Acidobacteria | 0.0001865     | 4.11  | 150%                   | 155%                    | 284%                   | 203%                     | 208%                       | 48%                | 189%              | 133%                | 138%                  | 184%                  | 131%                    | 71%                  | 103%                   |
| unclassified Acidobacteria Gp69 | Acidobacteria | 0.0000000     | 4.34  | 73%                    | 35%                     | 3%                     | 59%                      | 6%                         | 48%                | 51%               | 82%                 | 8%                    | 107%                  | 171%                    | 66%                  | 9%                     |
| unclassified Acidobacteria Gp70 | Acidobacteria | 0.0000241     | 4.79  | 51%                    | 20%                     | 57%                    | 102%                     | 109%                       | 38%                | 110%              | 199%                | 78%                   | 287%                  | 519%                    | 204%                 | 71%                    |
| unclassified Acidobacteria Gp71 | Acidobacteria | 0.000294      | 3.64  | 93%                    | 65%                     | 66%                    | 224%                     | 104%                       | 70%                | 73%               | 241%                | 112%                  | 104%                  | 343%                    | 159%                 | 39%                    |
| unclassified Acidobacteria Gp72 | Acidobacteria | 0.0005725     | 4.45  | 47%                    | 44%                     | 259%                   | 133%                     | 115%                       | 12%                | 759%              | 376%                | 326%                  | 587%                  | 299%                    | 260%                 | 447%                   |
| unclassified Acidobacteria Gp73 | Acidobacteria | 0.0005720     | 4.65  | 35%                    | 39%                     | 90%                    | 55%                      | 52%                        | 83%                | 189%              | 116%                | 110%                  | 228%                  | 140%                    | 61%                  | 87%                    |
| unclassified Acidobacteria Gp74 | Acidobacteria | 0.0000002     | 3.79  | 128%                   | 149%                    | 187%                   | 142%                     | 475%                       | 116%               | 146%              | 110%                | 370%                  | 129%                  | 95%                     | 76%                  | 95%                    |
| unclassified Acidobacteria Gp75 | Acidobacteria | 0.0004758     | 4.56  | 65%                    | 274%                    | 580%                   | 434%                     | 281%                       | 39%                | 83%               | 62%                 | 40%                   | 212%                  | 159%                    | 75%                  | 48%                    |

| Species                                          | Phylum                | P-values  | D.A score | Beni Igguer/ Metili/ % | Beni Igguer/ Ain Naga % | Beni Igguer/ Messud % | Beni Igguer/ Mouthbura % | Beni Igguer/ Zairfrane % | Beni Igguer/ Messud % | Beni Igguer/ Mouthbura % | Beni Igguer/ Zairfrane % | Ain Naga/ Metili/ % | Ain Naga/ Mouthbura % | Ain Naga/ Zairfrane % | Messud/ Mouthbura % | Messud/ Zairfrane % | Mouthbura/ Zairfrane % |      |
|--------------------------------------------------|-----------------------|-----------|-----------|------------------------|-------------------------|-----------------------|--------------------------|--------------------------|-----------------------|--------------------------|--------------------------|---------------------|-----------------------|-----------------------|---------------------|---------------------|------------------------|------|
| unclassified Plasticycists                       | Proteobacteria        | 0.0000023 | 3.85      | 12%                    | 4%                      | 16%                   | 13%                      | 8%                       | 33%                   | 135%                     | 110%                     | 71%                 | 407%                  | 332%                  | 215%                | 82%                 | 53%                    | 65%  |
| unclassified Phenolobacterium                    | Proteobacteria        | 0.0026468 | 4.14      | 23%                    | 2%                      | 139%                  | 127%                     | 127%                     | 20%                   | 123%                     | 112%                     | 112%                | 619%                  | 564%                  | 563%                | 91%                 | 91%                    | 100% |
| unclassified Phyllobacteriaceae                  | Proteobacteria        | 0.0000378 | 3.95      | 52%                    | 9%                      | 34%                   | 129%                     | 29%                      | 17%                   | 66%                      | 249%                     | 57%                 | 382%                  | 1449%                 | 329%                | 379%                | 86%                    | 23%  |
| unclassified Proteobacteria                      | Proteobacteria        | 0.0006293 | 4.42      | 69%                    | 66%                     | 106%                  | 129%                     | 81%                      | 95%                   | 153%                     | 186%                     | 117%                | 160%                  | 149%                  | 123%                | 122%                | 77%                    | 63%  |
| unclassified Rhizobiales                         | Proteobacteria        | 0.0000014 | 5.05      | 40%                    | 35%                     | 82%                   | 71%                      | 68%                      | 87%                   | 203%                     | 176%                     | 168%                | 233%                  | 202%                  | 193%                | 87%                 | 83%                    | 95%  |
| unclassified Rhodobacteraceae                    | Proteobacteria        | 0.0000389 | 3.78      | 264%                   | 222%                    | 485%                  | 543%                     | 122%                     | 84%                   | 184%                     | 206%                     | 46%                 | 218%                  | 245%                  | 55%                 | 112%                | 25%                    | 23%  |
| unclassified Rhodospirillaceae                   | Proteobacteria        | 0.0000000 | 4.22      | 35%                    | 50%                     | 73%                   | 181%                     | 33%                      | 144%                  | 212%                     | 523%                     | 94%                 | 147%                  | 362%                  | 65%                 | 246%                | 44%                    | 18%  |
| unclassified Rhodospirillum                      | Proteobacteria        | 0.0000069 | 3.90      | 69%                    | 73%                     | 142%                  | 284%                     | 120%                     | 106%                  | 206%                     | 410%                     | 173%                | 194%                  | 386%                  | 163%                | 199%                | 84%                    | 42%  |
| unclassified Rubellimicrobium                    | Proteobacteria        | 0.0000026 | 4.61      | 443%                   | 302%                    | 1579%                 | 901%                     | 1179%                    | 68%                   | 356%                     | 203%                     | 266%                | 522%                  | 298%                  | 390%                | 57%                 | 75%                    | 131% |
| unclassified Sclerotinia                         | Proteobacteria        | 0.0003025 | 4.13      | 48%                    | 38%                     | 388%                  | 125%                     | 50%                      | 42%                   | 333%                     | 108%                     | 43%                 | 802%                  | 259%                  | 103%                | 32%                 | 13%                    | 40%  |
| unclassified Sphingomonadaceae                   | Proteobacteria        | 0.0001146 | 4.70      | 76%                    | 58%                     | 70%                   | 95%                      | 43%                      | 77%                   | 92%                      | 124%                     | 56%                 | 119%                  | 160%                  | 73%                 | 134%                | 61%                    | 46%  |
| unclassified Sphingomonadus                      | Proteobacteria        | 0.0000053 | 4.13      | 104%                   | 44%                     | 61%                   | 108%                     | 31%                      | 42%                   | 95%                      | 104%                     | 30%                 | 139%                  | 160%                  | 72%                 | 178%                | 52%                    | 29%  |
| unclassified Sphingomonas                        | Proteobacteria        | 0.0014753 | 4.07      | 144%                   | 89%                     | 195%                  | 128%                     | 192%                     | 62%                   | 135%                     | 89%                      | 133%                | 220%                  | 247%                  | 21%                 | 66%                 | 99%                    | 150% |
| unclassified Sphingomonella                      | Proteobacteria        | 0.0027862 | 4.09      | 52%                    | 50%                     | 207%                  | 51%                      | 99%                      | 96%                   | 396%                     | 96%                      | 190%                | 414%                  | 101%                  | 198%                | 24%                 | 48%                    | 197% |
| unclassified Steroidobacter                      | Proteobacteria        | 0.0000032 | 4.42      | 13%                    | 6%                      | 22%                   | 26%                      | 19%                      | 43%                   | 166%                     | 198%                     | 147%                | 388%                  | 464%                  | 346%                | 119%                | 89%                    | 75%  |
| unclassified Xanthomonadaceae                    | Proteobacteria        | 0.0000000 | 4.64      | 33%                    | 5%                      | 30%                   | 90%                      | 10%                      | 14%                   | 91%                      | 270%                     | 29%                 | 632%                  | 1869%                 | 201%                | 296%                | 32%                    | 11%  |
| bacterium Ellin6510                              | unclassified Bacteria | 0.0000132 | 4.71      | 957%                   | 6732%                   | 262%                  | 944%                     | 816%                     | 703%                  | 27%                      | 99%                      | 85%                 | 4%                    | 14%                   | 12%                 | 361%                | 312%                   | 86%  |
| unclassified Bacteria                            | unclassified Bacteria | 0.0001553 | 5.96      | 82%                    | 103%                    | 67%                   | 82%                      | 75%                      | 125%                  | 81%                      | 99%                      | 91%                 | 65%                   | 79%                   | 73%                 | 122%                | 112%                   | 91%  |
| unclassified Bacteria                            | unclassified Bacteria | 0.0001541 | 4.15      | 10%                    | 23%                     | 72%                   | 72%                      | 41%                      | 23%                   | 758%                     | 753%                     | 433%                | 319%                  | 317%                  | 182%                | 99%                 | 57%                    | 57%  |
| unclassified GP10                                | unclassified Bacteria | 0.0001731 | 4.06      | 200%                   | 200%                    | 321%                  | 270%                     | 254%                     | 100%                  | 160%                     | 135%                     | 127%                | 161%                  | 135%                  | 127%                | 84%                 | 79%                    | 94%  |
| unclassified GP4                                 | unclassified Bacteria | 0.0001146 | 4.71      | 65%                    | 281%                    | 59%                   | 42%                      | 73%                      | 433%                  | 91%                      | 64%                      | 113%                | 21%                   | 15%                   | 76%                 | 71%                 | 124%                   | 175% |
| unclassified GP7                                 | unclassified Bacteria | 0.0007332 | 4.28      | 108%                   | 187%                    | 261%                  | 103%                     | 168%                     | 174%                  | 242%                     | 95%                      | 156%                | 139%                  | 55%                   | 90%                 | 39%                 | 64%                    | 163% |
| unclassified Parabacteria genera incertae sedis  | unclassified Bacteria | 0.0012838 | 3.66      | 30%                    | 20%                     | 20%                   | 18%                      | 11%                      | 67%                   | 69%                      | 61%                      | 38%                 | 102%                  | 90%                   | 56%                 | 85%                 | 55%                    | 62%  |
| unclassified Subdivisions3 genera incertae sedis | unclassified Bacteria | 0.0005943 | 3.67      | 119%                   | 136%                    | 250%                  | 148%                     | 189%                     | 114%                  | 209%                     | 123%                     | 158%                | 184%                  | 109%                  | 139%                | 59%                 | 76%                    | 128% |
| unclassified WPS 1 genera incertae sedis         | unclassified Bacteria | 0.0000009 | 5.37      | 35%                    | 42%                     | 35%                   | 17%                      | 26%                      | 118%                  | 91%                      | 48%                      | 73%                 | 77%                   | 41%                   | 62%                 | 53%                 | 80%                    | 151% |
| unclassified WPS 2 genera incertae sedis         | unclassified Bacteria | 0.0003340 | 4.37      | 131%                   | 360%                    | 229%                  | 189%                     | 259%                     | 275%                  | 169%                     | 145%                     | 198%                | 61%                   | 53%                   | 128%                | 86%                 | 117%                   | 137% |
| unclassified Opuntis                             | Verrucomicrobia       | 0.0023655 | 4.32      | 111%                   | 53%                     | 191%                  | 65%                      | 67%                      | 47%                   | 171%                     | 59%                      | 60%                 | 363%                  | 124%                  | 128%                | 34%                 | 35%                    | 103% |
| unclassified Saprochloa genera incertae sedis    | Verrucomicrobia       | 0.0000780 | 4.47      | 49%                    | 45%                     | 49%                   | 14%                      | 38%                      | 67%                   | 88%                      | 28%                      | 78%                 | 97%                   | 31%                   | 86%                 | 32%                 | 88%                    | 273% |
| unclassified Verrucomicrobia                     | Verrucomicrobia       | 0.0007743 | 4.37      | 70%                    | 47%                     | 49%                   | 44%                      | 38%                      | 67%                   | 71%                      | 63%                      | 55%                 | 105%                  | 93%                   | 82%                 | 89%                 | 78%                    | 87%  |

A)

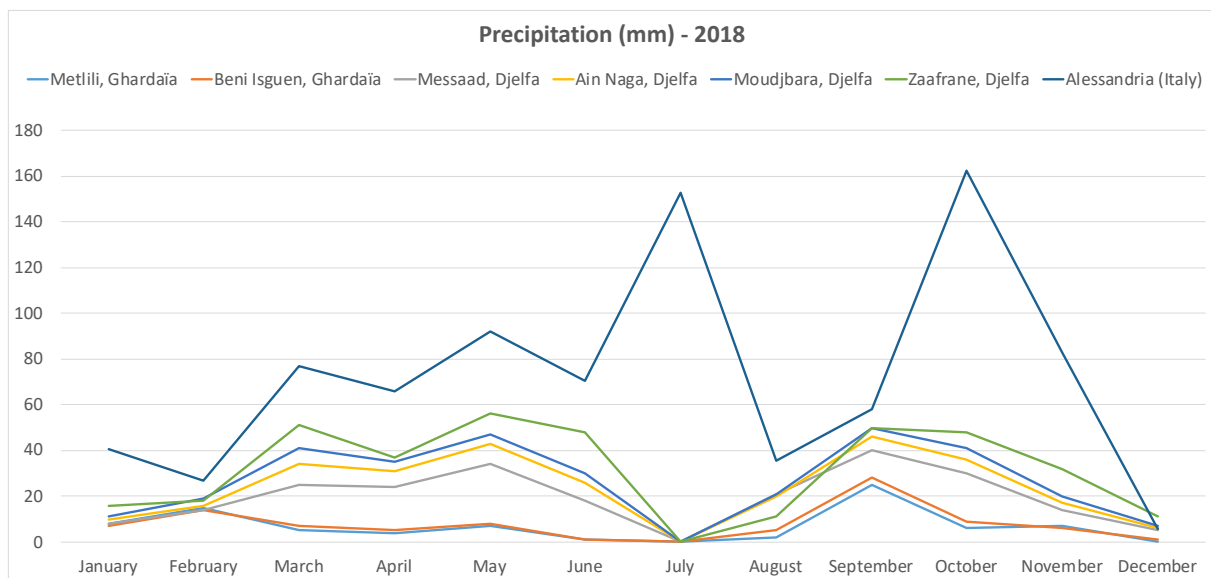

B)

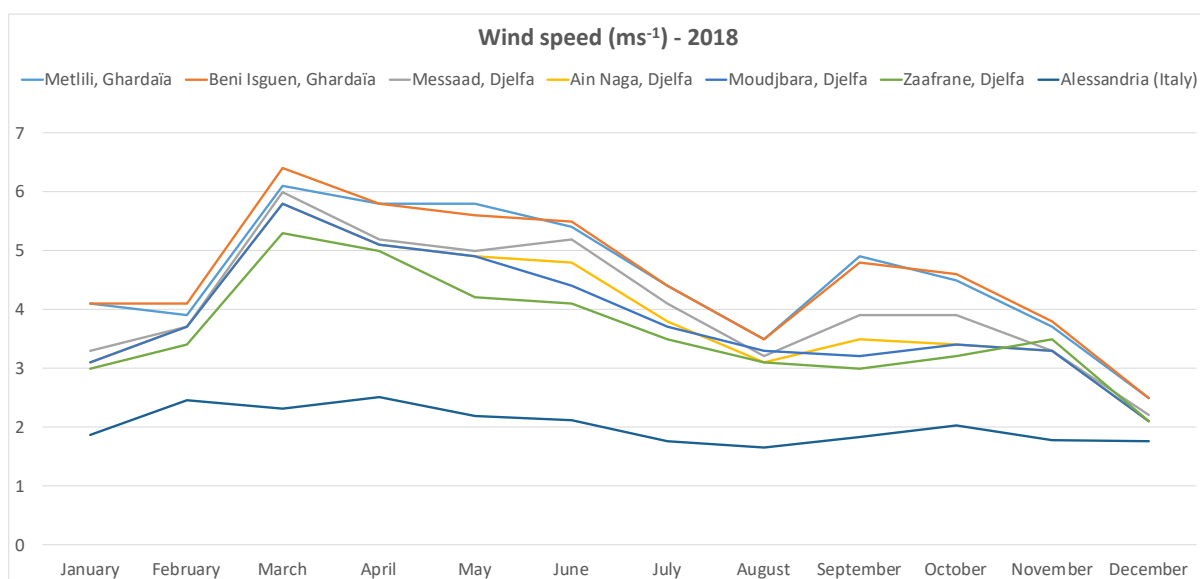

C)

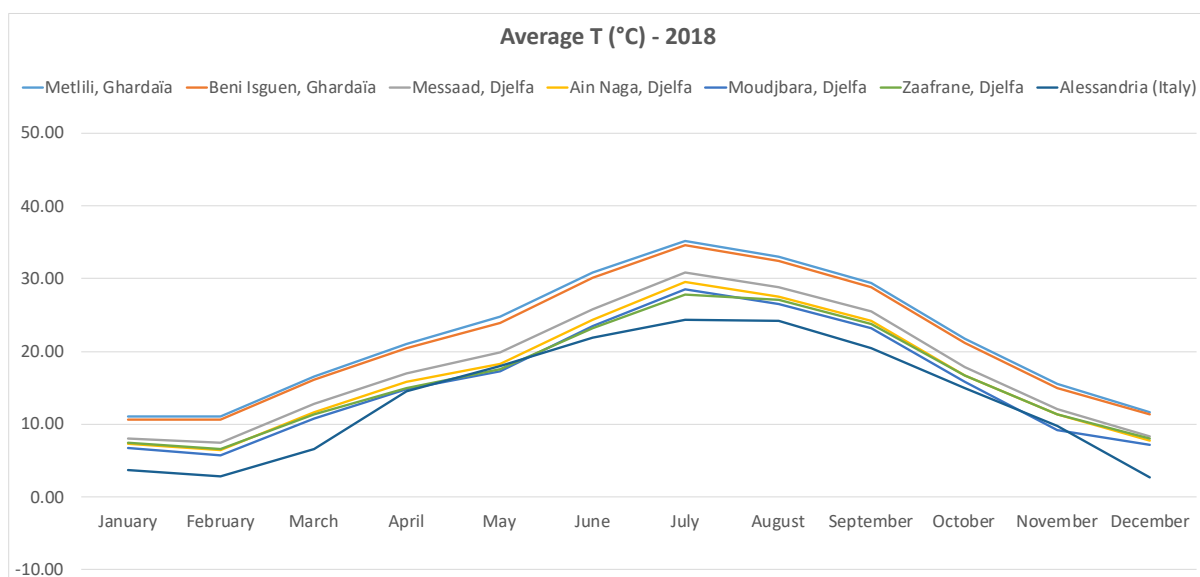

Figure S1.

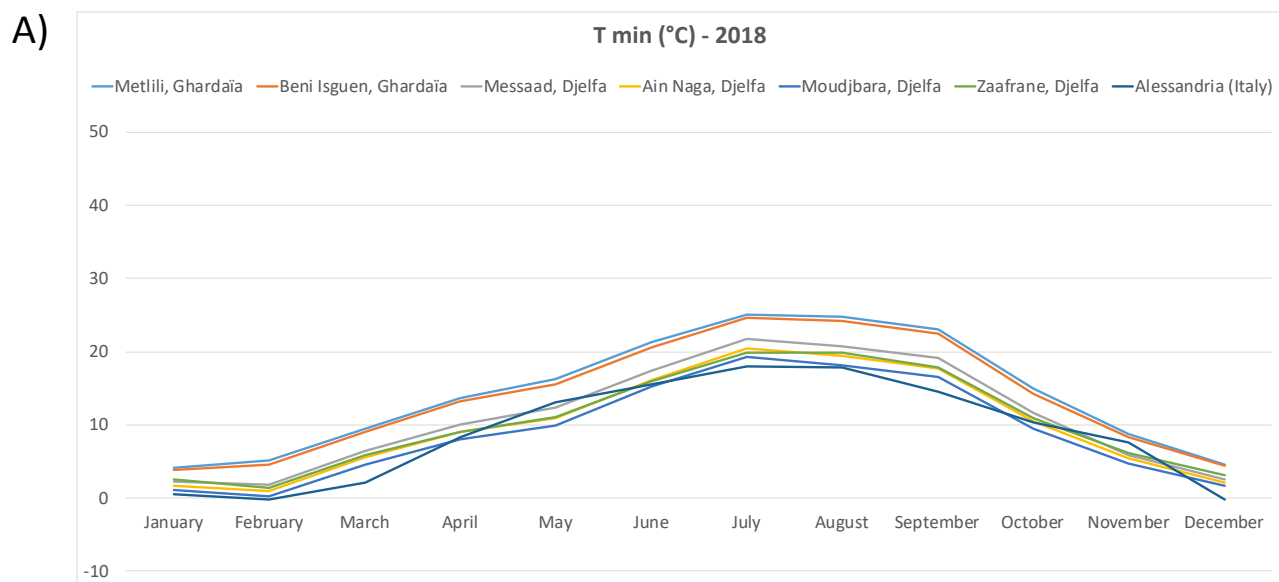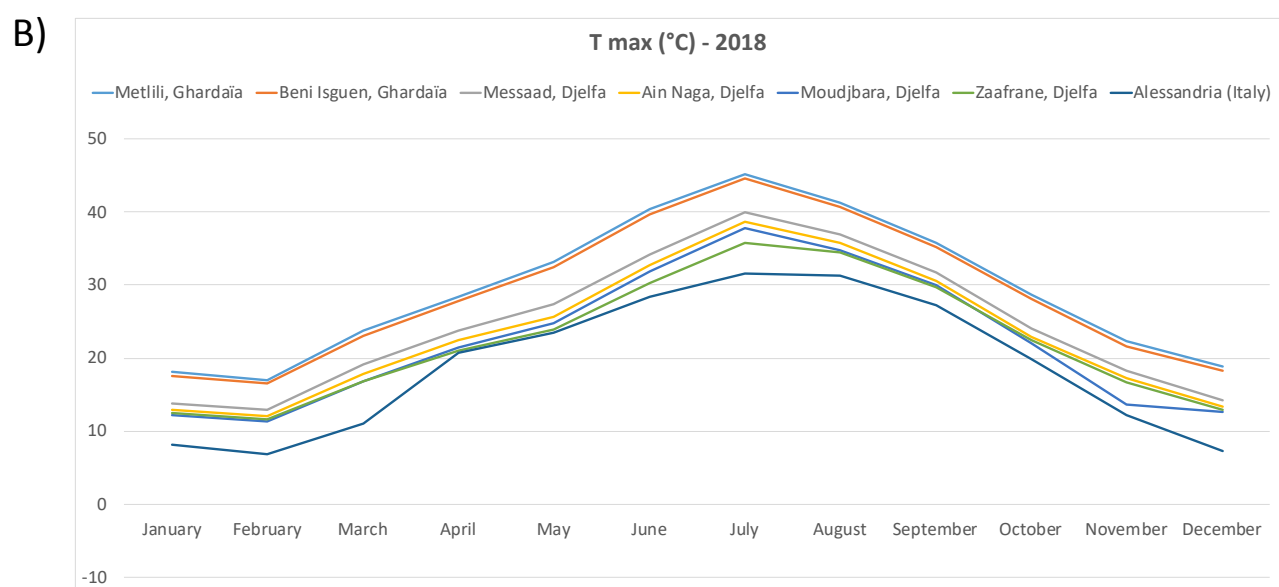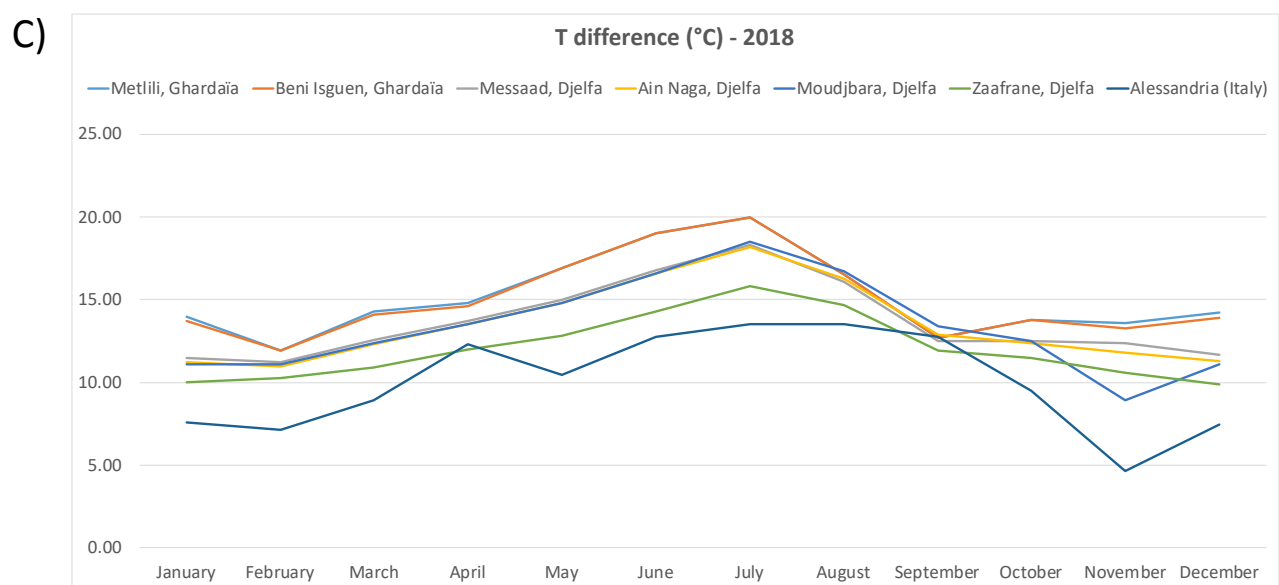

**Figure S2.**

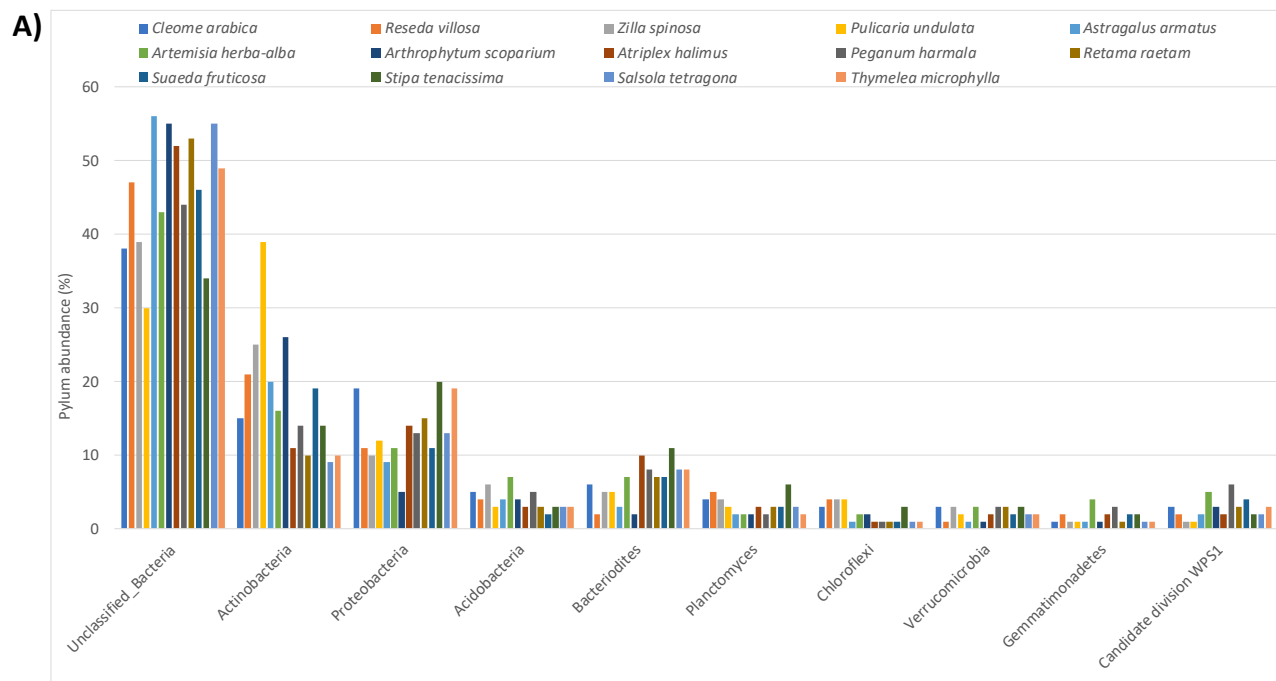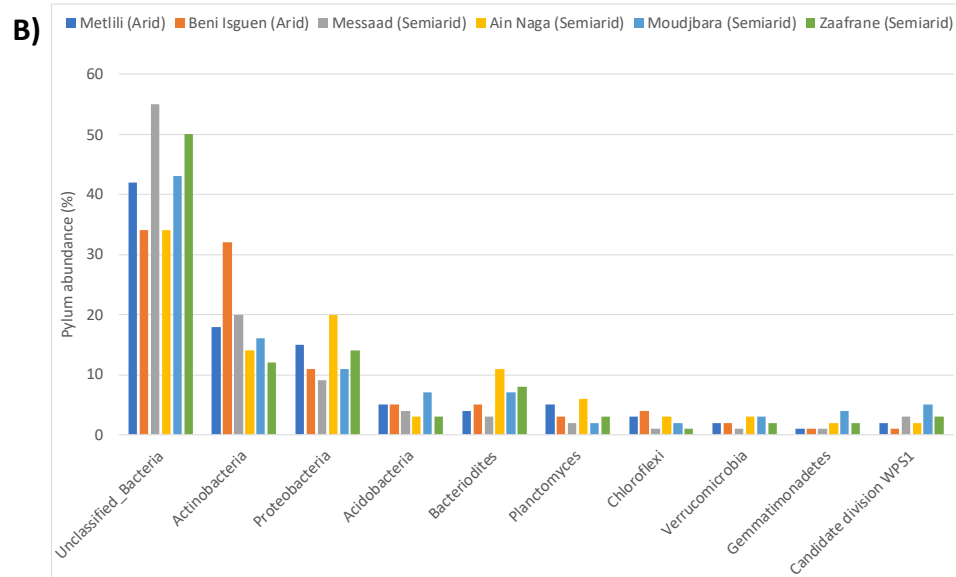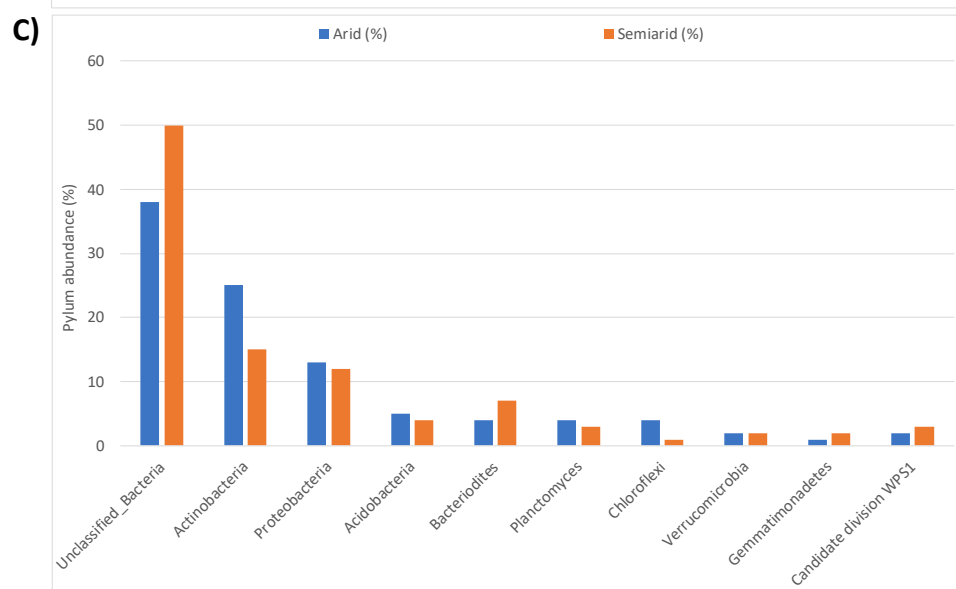

**Figure S3.**

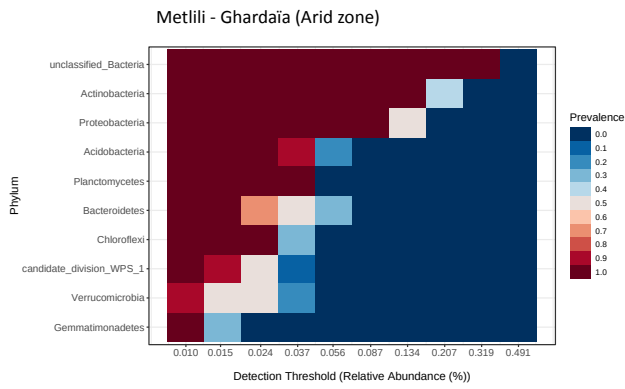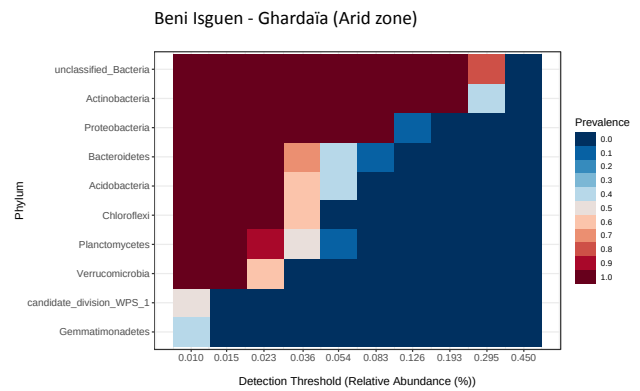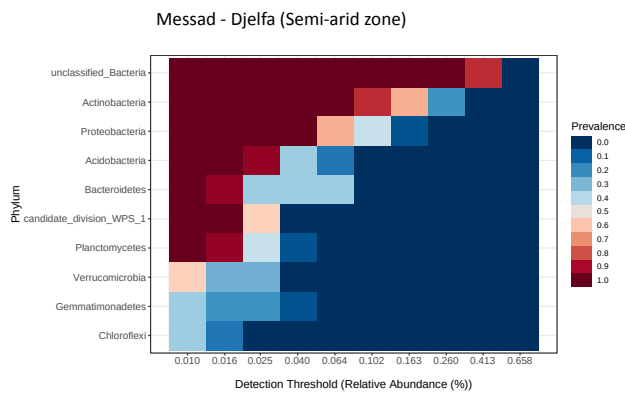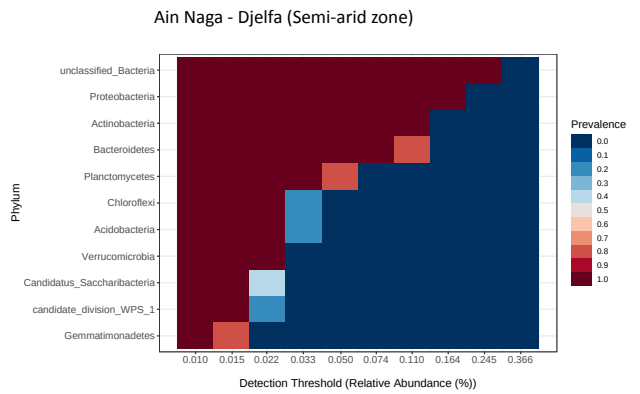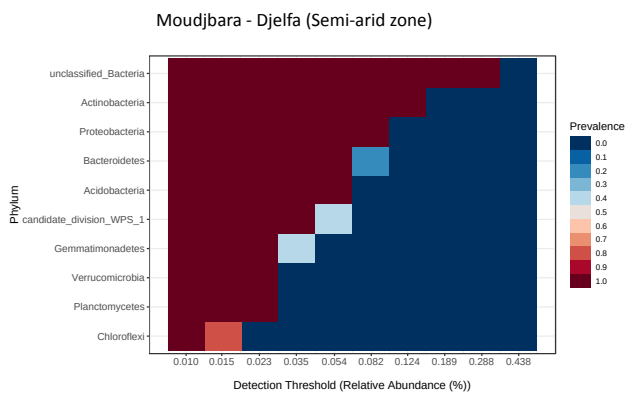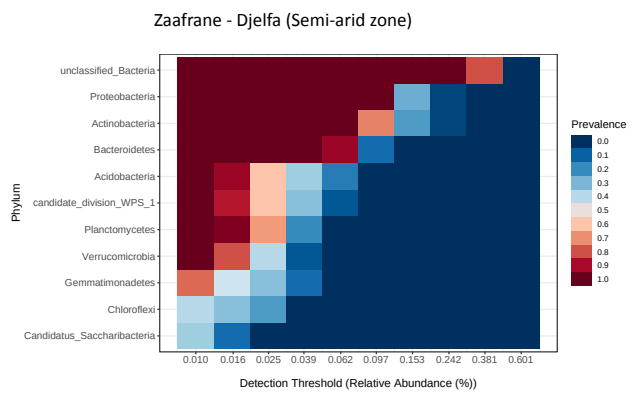

**Figure S4.**

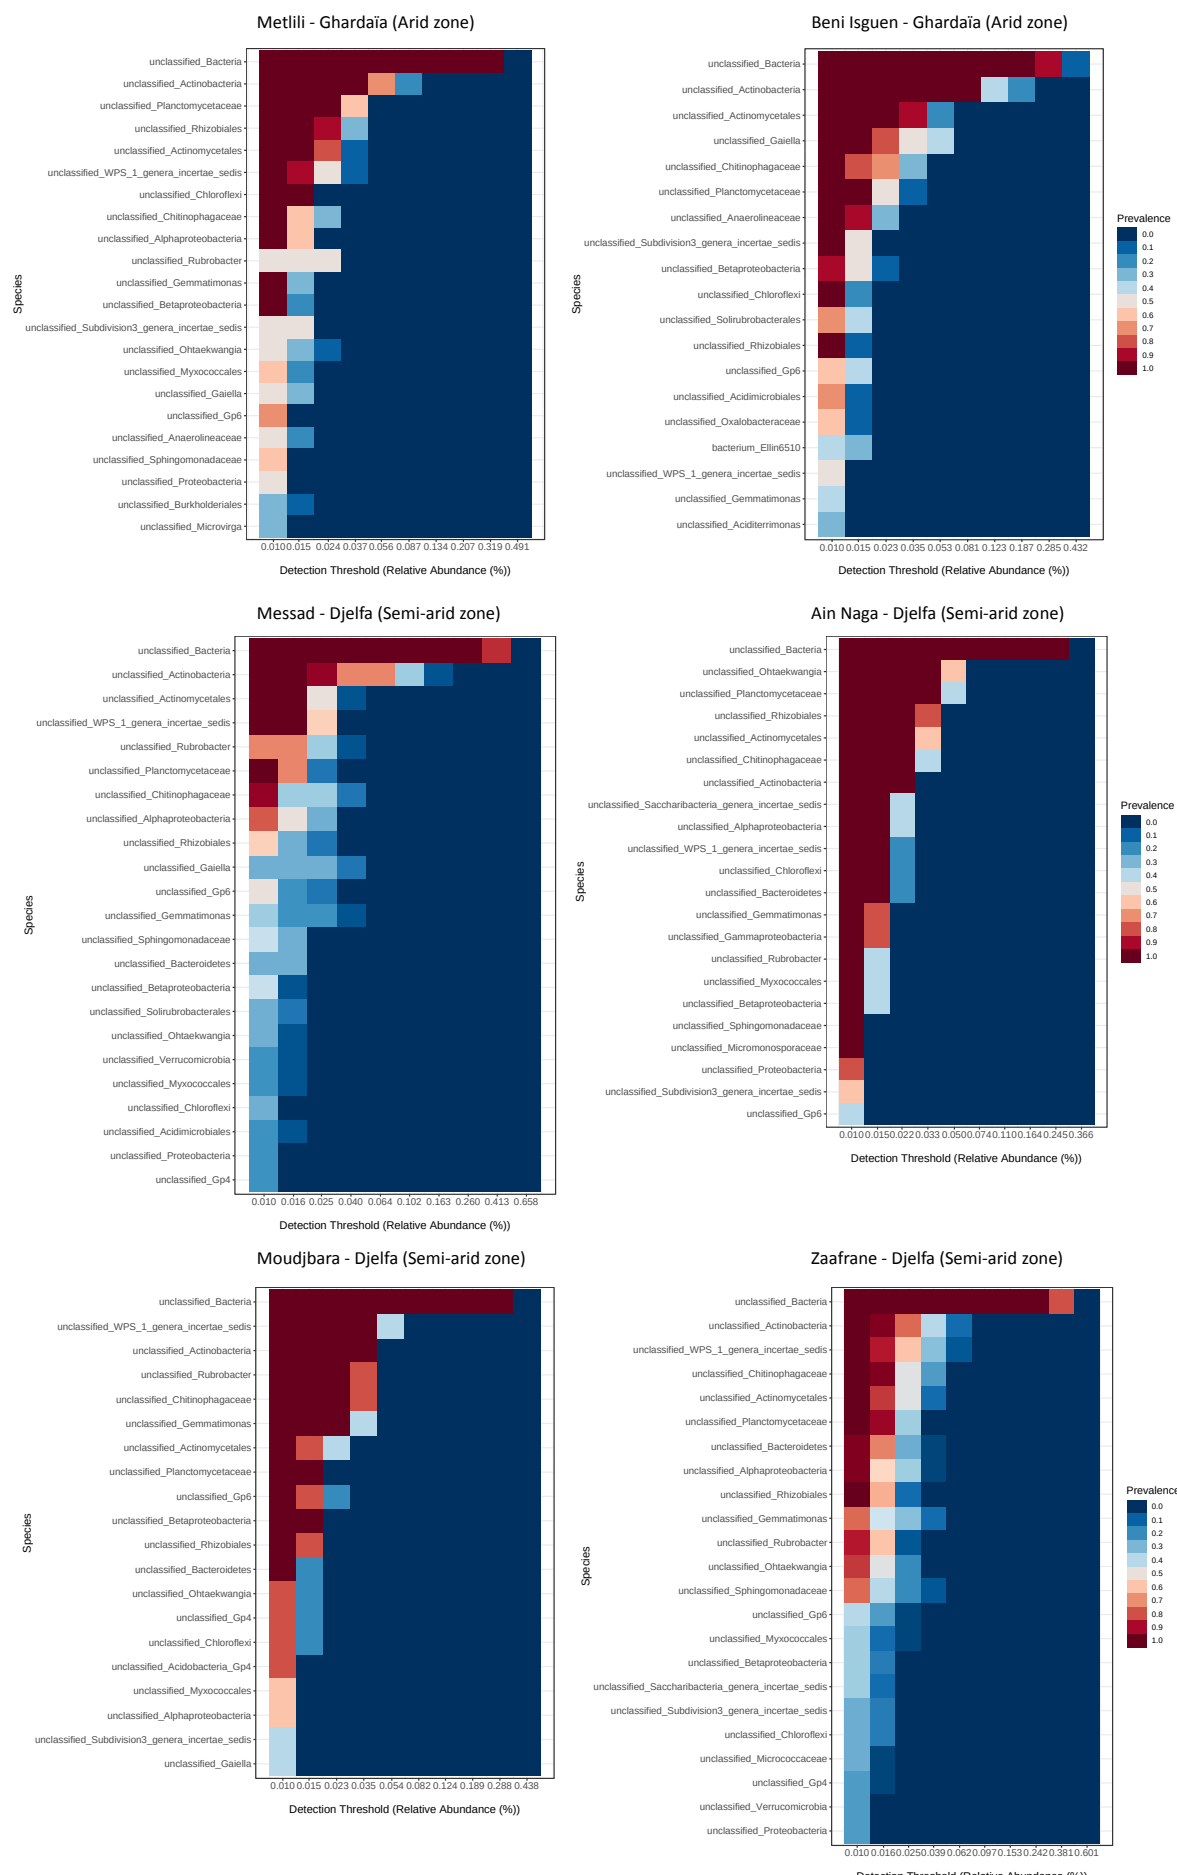

**Figure S5.**

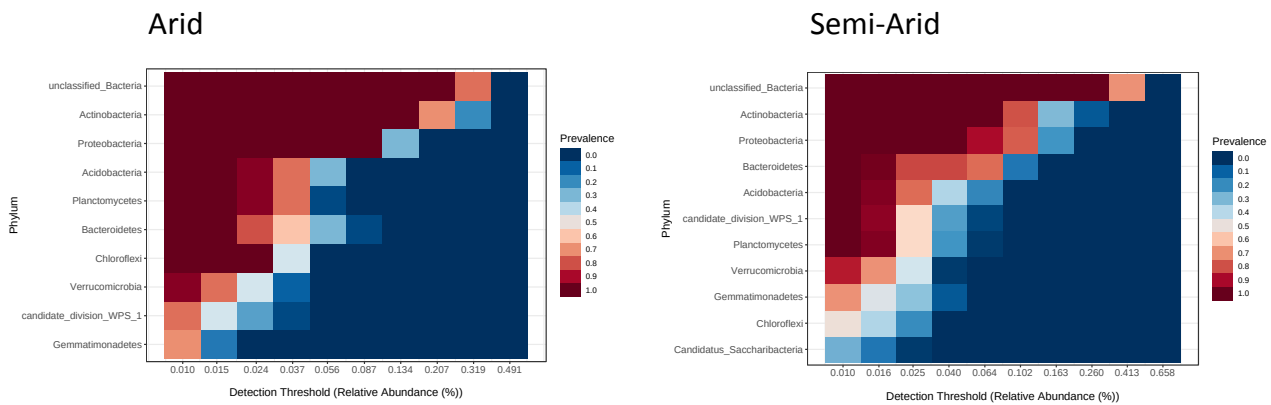

Figure S6.

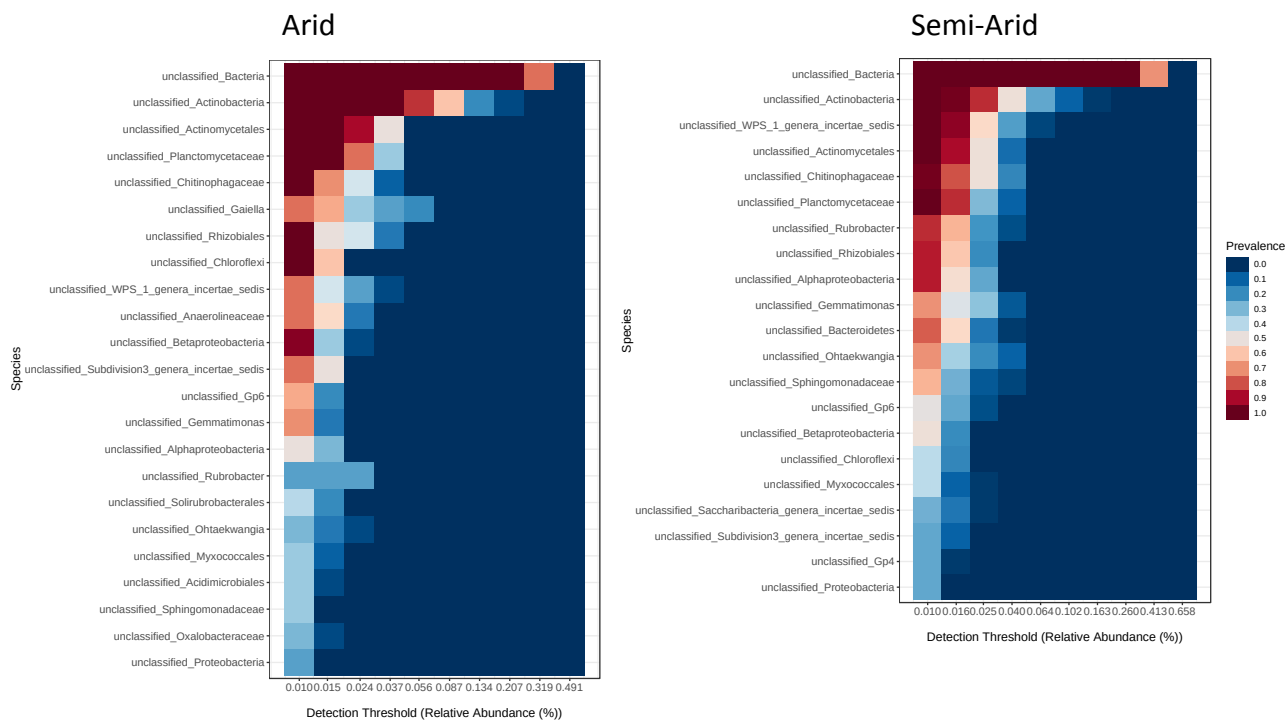

Figure S7.



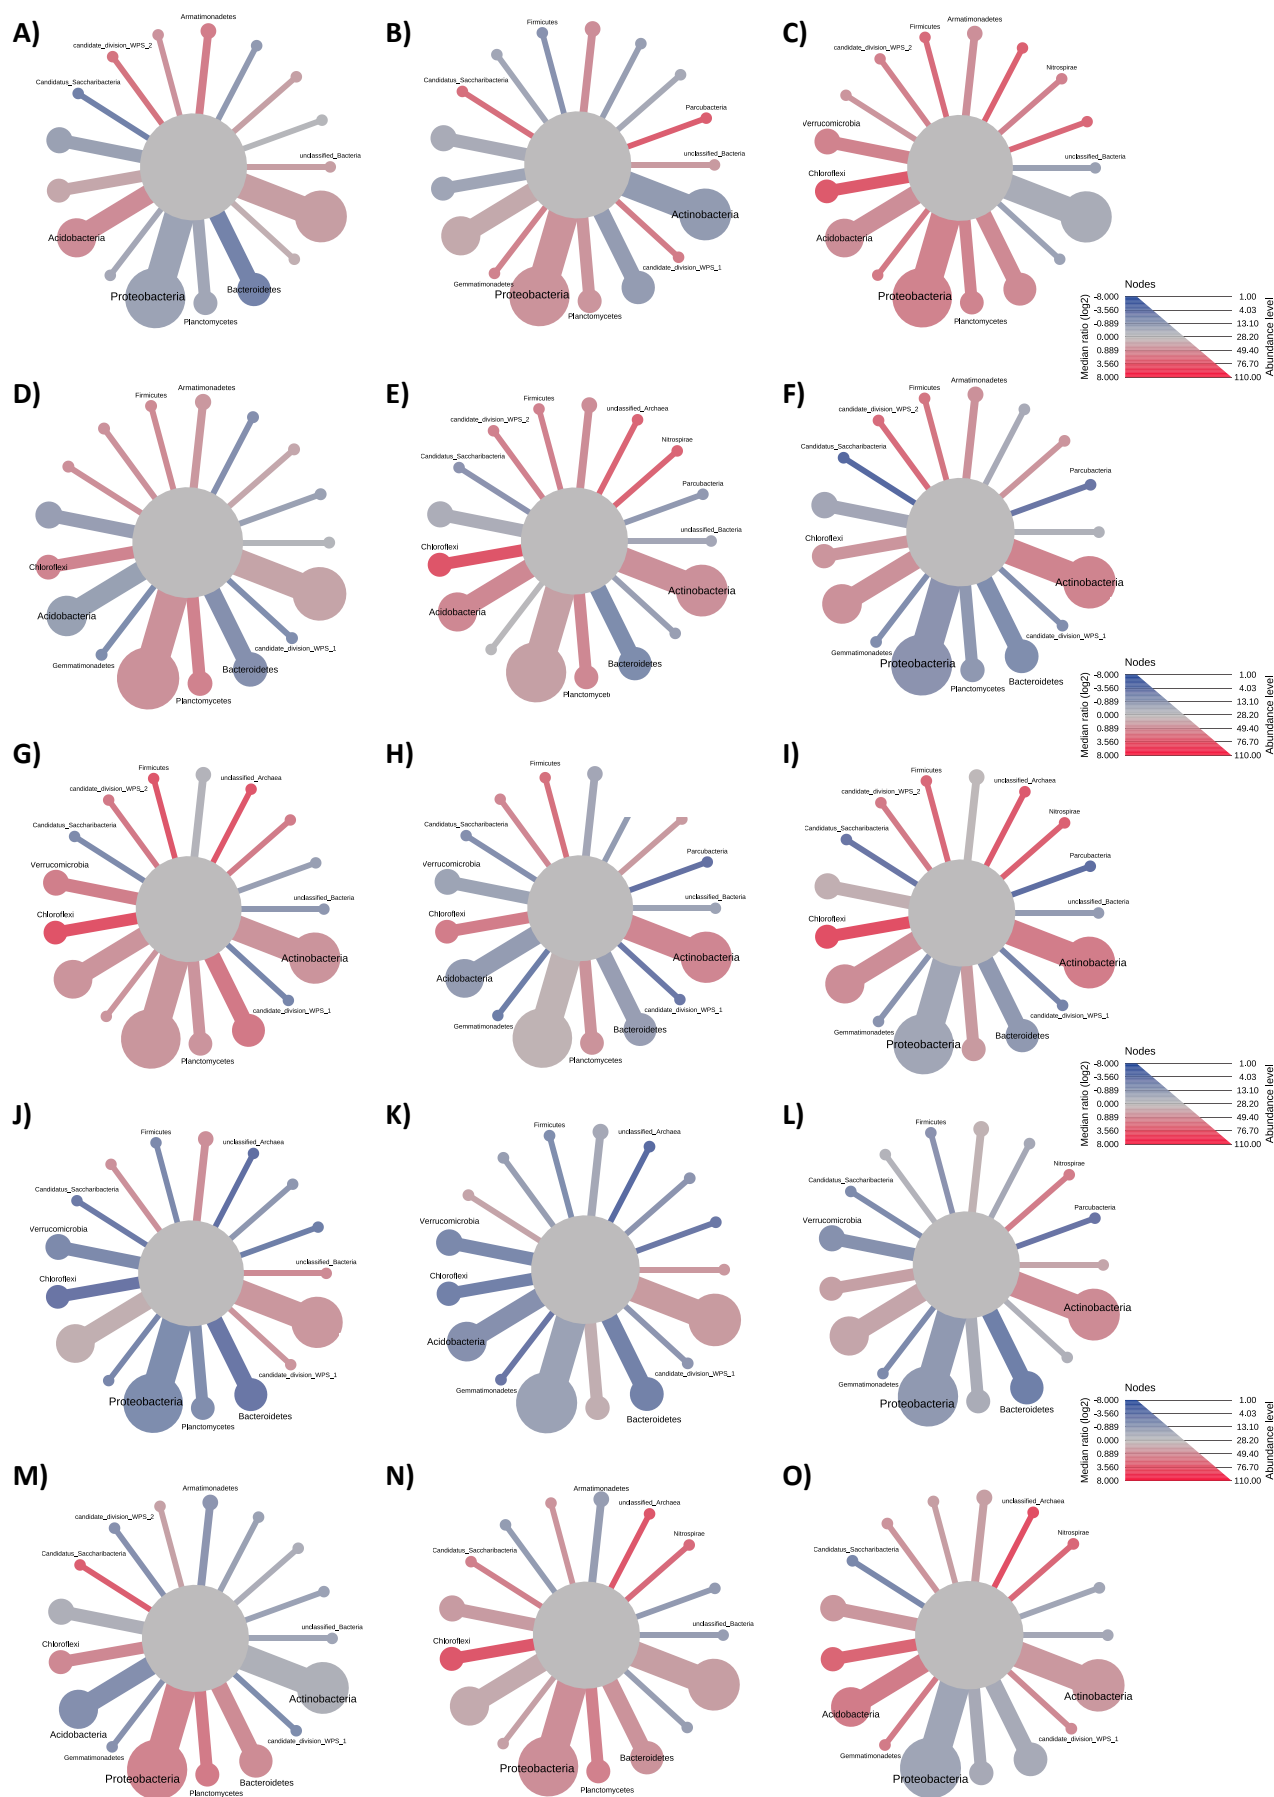

Figure S8.
